# Supplementary material
Source: publisher figshare collection journal article supplement (https://gsajournals.figshare.com/articles/dataset/_/10029161)
Supplement: Supplementary file 1 [file 4]

## Literature Cited in Supplemental Materials

- Bahler, J., J. Q. Wu, M. S. Longtine, N. G. Shah, A. McKenzie, 3rd *et al.*, 1998 Heterologous modules for efficient and versatile PCR-based gene targeting in *Schizosaccharomyces pombe*. *Yeast* 14: 943-951.
- Baldo, V., V. Testoni, G. Lucchini and M. P. Longhese, 2008 Dominant TEL1-hy mutations compensate for Mec1 lack of functions in the DNA damage response. *Mol Cell Biol* 28: 358-375.
- Goldstein, A. L., and J. H. McCusker, 1999 Three new dominant drug resistance cassettes for gene disruption in *Saccharomyces cerevisiae*. *Yeast* 15: 1541-1553.
- Green, M., and J. Sambrook, 2012 *Molecular Cloning: A Laboratory Manual*
- Lee, S.-J., M. F. Schwartz, J. K. Duong and D. F. Stern, 2003 Rad53 Phosphorylation Site Clusters Are Important for Rad53 Regulation and Signaling. *Molecular and Cellular Biology* 23: 6300-6314.
- Ma, Y., and C. W. Greider, 2009 Kinase-independent functions of TEL1 in telomere maintenance. *Mol Cell Biol* 29: 5193-5202.
- Mumberg, D., R. Muller and M. Funk, 1995 Yeast vectors for the controlled expression of heterologous proteins in different genetic backgrounds. *Gene* 156: 119-122.
- Norrand, J., T. Kempe and J. Messing, 1983 Construction of improved M13 vectors using oligodeoxynucleotide-directed mutagenesis. *Gene* 26: 101-106.

- Ralser, M., H. Kuhl, M. Ralser, M. Werber, H. Lehrach *et al.*, 2012 The *Saccharomyces cerevisiae* W303-K6001 cross-platform genome sequence: insights into ancestry and physiology of a laboratory mutt. *Open Biol* 2: 120093.
- Sikorski, R. S., and J. D. Boeke, 1991 In vitro mutagenesis and plasmid shuffling: from cloned gene to mutant yeast. *Methods Enzymol* 194: 302-318.
- Sikorski, R. S., and P. Hieter, 1989 A system of shuttle vectors and yeast host strains designed for efficient manipulation of DNA in *Saccharomyces cerevisiae*. *Genetics* 122: 19-27.
- Winzeler, E. A., D. D. Shoemaker, A. Astromoff, H. Liang, K. Anderson *et al.*, 1999 Functional characterization of the *S. cerevisiae* genome by gene deletion and parallel analysis. *Science* 285: 901-906.
